# Supplementary material
Source: MDPI journal article supplement (https://www.mdpi.com/2673-7140/3/3/44)
Supplement: s1 [file s1]

## Supplementary Materials

**Table S1.** Top genes up-regulated or down-regulated by GPR158 over-expression

| Exp 1                    |             | Exp 2A           |             | Exp 2B           |             |
|--------------------------|-------------|------------------|-------------|------------------|-------------|
| Low Doxycycline          |             | High Doxycycline |             | High Doxycycline |             |
| 72 hrs                   |             | 24 hrs           |             | 96 hrs           |             |
|                          |             |                  |             |                  |             |
| Top Up-Regulated Genes   |             |                  |             |                  |             |
| Gene                     | Fold-Change | Gene             | Fold-Change | Gene             | Fold-Change |
| H19                      | 1.545       | SLC8A2           | 2.174       | LMOD3            | 1.742       |
| SERPINE1                 | 1.460       | CDC42EP5         | 1.708       | FAM175A          | 1.680       |
| TP53I3                   | 1.362       | COL10A1          | 1.686       | ZNF14            | 1.642       |
| GDF15                    | 1.354       | RAP1GAP          | 1.596       | ZNF486           | 1.635       |
| PICALM                   | 1.333       | DLG4             | 1.488       | SHROOM4          | 1.630       |
| IFI44                    | 1.321       | BRSK1            | 1.475       | CATSPER2         | 1.627       |
| TMEM158                  | 1.294       | GPR162           | 1.458       | DMC1             | 1.626       |
| NCEH1                    | 1.277       | QPRT             | 1.458       | BLZF1            | 1.623       |
| IL32                     | 1.276       | DACT3            | 1.457       | CDKN2AIPNL       | 1.588       |
| PLCH2                    | 1.265       | SIRT4            | 1.433       | ALPP             | 1.579       |
|                          |             |                  |             |                  |             |
| Top Down-Regulated Genes |             |                  |             |                  |             |
| Gene                     | Fold-Change | Gene             | Fold-Change | Gene             | Fold-Change |
| GAS1                     | -1.516      | RGS4             | -2.778      | DDIT3            | -1.594      |
| SVEP1                    | -1.444      | AKR1C4           | -2.206      | YWHAE            | -1.534      |
| AKR1C3                   | -1.443      | IL6              | -2.067      | NUPR1            | -1.413      |
| PDGFRB                   | -1.441      | AKR1C1/C2        | -1.991      | HSPA5            | -1.393      |
| EPAS1                    | -1.387      | CXCL12           | -1.879      | PLCG1            | -1.387      |
| CHI3L1                   | -1.370      | KLF6             | -1.818      | CHMP3            | -1.373      |
| RN7SK                    | -1.355      | THBS2            | -1.809      | AFF4             | -1.370      |
| RXRA                     | -1.328      | TNFRSF21         | -1.746      | INHBE            | -1.364      |
| CA12                     | -1.317      | CCL2             | -1.744      | TMEM50B          | -1.319      |
| AKR1C4                   | -1.313      | RARRES1          | -1.742      | MANF             | -1.312      |
